# Supplementary material
Source: MDPI journal article supplement (https://www.mdpi.com/2410-3888/2/2/8)
Supplement: s1 [file s1]

**Table S1.** List of shark species analysed in the present study.

| **No.** | **Order** | **Family** | **Species** |
| --- | --- | --- | --- |
| 1 | Carcharihiniformes | Carcharhinidae | *Carcharhinus amblyrhynchoides* Whitley, 1934 |
| 2 | Carcharihiniformes | Carcharhinidae | *C. amblyrhynchos* Bleeker, 1856 |
| 3 | Carcharihiniformes | Carcharhinidae | *C. amboiensis* Müller & Henle, 1839 |
| 4 | Carcharihiniformes | Carcharhinidae | *C. brachyurus* Günther, 1870 |
| 5 | Carcharihiniformes | Carcharhinidae | *C. longimanus* Poey, 1861 |
| 6 | Carcharihiniformes | Carcharhinidae | *C. leucas* Müller & Henle, 1839 |
| 7 | Carcharihiniformes | Carcharhinidae | *C. limbatus* Müller & Henle, 1839 |
| 8 | Carcharihiniformes | Carcharhinidae | *C. melanopterus* Quoy & Gaimard, 1824 |
| 9 | Carcharihiniformes | Carcharhinidae | *C. obscurus* Lesueur, 1818 |
| 10 | Carcharihiniformes | Carcharhinidae | *C. plumbeus* Nardo, 1827 |
| 11 | Carcharihiniformes | Carcharhinidae | *C. signatus* Poey, 1868 |
| 12 | Carcharihiniformes | Carcharhinidae | *Galeocerdo cuvier* Péron & Lesueur, 1822 |
| 13 | Carcharihiniformes | Carcharhinidae | *Negaprion brevirostris* Poey, 1868 |
| 14 | Carcharihiniformes | Carcharhinidae | *Prionace glauca* L., 1758 |
| 15 | Carcharihiniformes | Carcharhinidae | *Rhizoprionodon acutus* Rüppell, 1837 |
| 16 | Carcharihiniformes | Carcharhinidae | *R. terranovae* Richardson, 1836 |
| 17 | Carcharihiniformes | Hemigaleidae | *Hemigaleus microstoma* Bleeker, 1852 |
| 18 | Carcharihiniformes | Scyliorhinidae | *Scyliorhinus stellaris* L., 1758 |
| 19 | Carcharihiniformes | Sphyrnidae | *Sphyrna lewini* Griffith & Smith, 1834 |
| 20 | Carcharihiniformes | Sphyrnidae | *S. tudes* Valenciennes, 1822 |
| 21 | Carcharihiniformes | Sphyrnidae | *S. zygaena* L., 1758 |
| 22 | Carcharihiniformes | Triakidae | *Galeorhinus galeus* L., 1758 |
| 23 | Carcharihiniformes | Triakidae | *Mustelus antarcticus* Günther, 1870 |
| 24 | Carcharihiniformes | Triakidae | *M. californicus* Gill, 1864 |
| 25 | Carcharihiniformes | Triakidae | *M. canis* Mitchill, 1815 |
| 26 | Carcharihiniformes | Triakidae | *M. manazo* Bleeker, 1852 |
| 27 | Carcharihiniformes | Triakidae | *M. mustelus* L., 1758 |
| 28 | Carcharihiniformes | Triakidae | *Triakis semifasciata* Girard, 1855 |
| 29 | Hexanchiformes | Hexanchidae | *Heptranchias perlo* Bonnaterre, 1788 |
| 30 | Hexanchiformes | Hexanchidae | *Hexanchus griseus* Bonnaterre, 1788 |
| 31 | Hexanchiformes | Hexanchidae | *Notorhynchus cepedianus* Péron, 1807 |
| 32 | Lamniformes | Alopiidae | *Alopias superciliosus* Lowe, 1841 |
| 33 | Lamniformes | Alopiidae | *A. vulpinus* Bonnaterre, 1788 |
| 34 | Lamniformes | Lamnidae | *Carcharodon carcharias* L., 1758 |
| 35 | Lamniformes | Lamnidae | *Isurus oxyrhynchus* Rafinesque, 1810 |
| 36 | Lamniformes | Lamnidae | *Lamna ditrois* Hubbs & Follett, 1947 |
| 37 | Lamniformes | Lamnidae | *L. nasus* Bonnaterre, 1788 |
| 38 | Lamniformes | Odontaspidae | *Carcharias taurus* Rafinesque, 1810 |
| 39 | Orectolobiformes | Ginglyostomatidae | *Ginglyostoma cirratum* Bonnaterre, 1788 |
| 40 | Orectolobiformes | Ginglyostomatidae | *Nebrius ferrugineus* Lesson, 1831 |
| 41 | Orectolobiformes | Orectolobidae | *Sutorectus tentaculatus* Peters, 1864 |
| 42 | Orectolobiformes | Parascyllidae | *Parascyllium ferrugineum* McCulloch, 1911 |
| 43 | Orectolobiformes | Stegostomatidae | *Stegostoma fasciatum* Hermann, 1783 |
| 44 | Pristiophoriformes | Pristiophoridae | *Pristiophorus cirratus* Latham, 1794 |
| 45 | Squaliformes | Centrophoridae | *Centrophorus moluccensis* Bleeker, 1860 |
| 46 | Squaliformes | Centrophoridae | *C. squamosus* Bonnaterre, 1788 |
| 47 | Squaliformes | Centrophoridae | *Deania hystricosa* Garman, 1906 |
| 48 | Squaliformes | Dalatidae | *Dalatias lichia* Bonnaterre, 1788 |
| 49 | Squaliformes | Squalidae | *Squalus acanthias* L., 1758 |
| 50 | Squatiniformes | Squatinidae | *Squatina squatina* L., 1758 |

**Table S2.** SIMPER analysis results for similarities in each habitat of all sharks.

| **Genus** | **Average No. of species** | **Average similarity** | **SD of similarity** | **Contribution  (%)** | **Cumulative  contribution (%)** |
| --- | --- | --- | --- | --- | --- |
| **Group Pelagial: average similarity = 22.29** | | | | | |
| *Nybelinia* | 1.3 | 5.86 | 0.58 | 26.31 | 26.31 |
| *Otobothrium* | 1 | 3.25 | 0.5 | 14.59 | 40.9 |
| *Dasyrhynchus* | 0.74 | 2.99 | 0.48 | 13.4 | 54.3 |
| *Heteronybelinia* | 0.56 | 2.23 | 0.37 | 10.02 | 64.31 |
| *Callitetrarhynchus* | 0.52 | 2.2 | 0.44 | 9.85 | 74.16 |
| *Tentacularia* | 0.37 | 1.49 | 0.36 | 6.69 | 80.85 |
| *Grillotia* | 0.3 | 1.27 | 0.22 | 5.68 | 86.53 |
| *Floriceps* | 0.33 | 1.11 | 0.32 | 4.98 | 91.51 |
| *Poecilancistrum* | 0.22 | 0.45 | 0.2 | 2 | 93.51 |
| *Mixonybelinia* | 0.26 | 0.39 | 0.17 | 1.75 | 95.25 |
| *Pseudogrillotia* | 0.22 | 0.28 | 0.17 | 1.24 | 96.5 |
| *Gymnorhynchus* | 0.19 | 0.23 | 0.13 | 1.04 | 97.54 |
| *Molicola* | 0.15 | 0.2 | 0.13 | 0.9 | 98.44 |
| *Hepatoxylon* | 0.15 | 0.11 | 0.09 | 0.51 | 98.95 |
| *Dollfusiella* | 0.15 | 0.08 | 0.09 | 0.37 | 99.32 |
| *Sphyriocephalus* | 0.15 | 0.08 | 0.05 | 0.34 | 99.67 |
| *Lacistorhynchus* | 0.11 | 0.05 | 0.05 | 0.23 | 99.9 |
| *Prochristianella* | 0.07 | 0.02 | 0.05 | 0.1 | 100 |
|  |  |  |  |  |  |
| **Group Benthal: average similarity = 15.64** | | | | | |
| *Dollfusiella* | 0.70 | 4.51 | 0.41 | 28.86 | 28.86 |
| *Nybelinia* | 0.55 | 4.47 | 0.44 | 28.58 | 57.44 |
| *Grillotia* | 0.45 | 3.03 | 0.26 | 19.37 | 76.81 |
| *Lacistorhynchus* | 0.30 | 1.52 | 0.27 | 9.70 | 86.51 |
| *Gilquinia* | 0.25 | 0.99 | 0.17 | 6.33 | 92.84 |
| *Prochristianella* | 0.20 | 0.23 | 0.12 | 1.49 | 94.33 |
| *Diesingium* | 0.20 | 0.18 | 0.13 | 1.14 | 95.47 |
| *Trigonolobium* | 0.10 | 0.18 | 0.07 | 1.12 | 96.59 |
| *Tetrarhynchobothrium* | 0.15 | 0.17 | 0.13 | 1.09 | 97.69 |
| *Mixonybelinia* | 0.10 | 0.11 | 0.07 | 0.67 | 98.36 |
| *Heteronybelinia* | 0.15 | 0.08 | 0.07 | 0.52 | 98.88 |
| *Pseudolacistorhynchus* | 0.15 | 0.07 | 0.07 | 0.45 | 99.33 |
| *Callitetrarhynchus* | 0.10 | 0.05 | 0.07 | 0.34 | 99.66 |
| *Eutetrarhynchus* | 0.10 | 0.05 | 0.07 | 0.34 | 100.00 |

**Table S3.** SIMPER analysis results for similarities in each diet of all sharks.

| **Genus** | **Average No. of species** | **Average similarity** | **SD of similarity** | **Contribution  (%)** | **Cumulative  contribution (%)** |
| --- | --- | --- | --- | --- | --- |
| **Group Fish: average similarity = 19.38** | | | | | |
| *Nybelinia* | 1.19 | 5.9 | 0.58 | 30.43 | 30.43 |
| *Grillotia* | 0.59 | 2.9 | 0.3 | 14.98 | 45.41 |
| *Heteronybelinia* | 0.53 | 2.04 | 0.34 | 10.53 | 55.94 |
| *Otobothrium* | 0.72 | 1.92 | 0.37 | 9.89 | 65.83 |
| *Dasyrhynchus* | 0.59 | 1.88 | 0.36 | 9.72 | 75.56 |
| *Callitetrarhynchus* | 0.41 | 1.35 | 0.32 | 6.96 | 82.51 |
| *Tentacularia* | 0.28 | 0.89 | 0.26 | 4.57 | 87.08 |
| *Floriceps* | 0.25 | 0.64 | 0.23 | 3.29 | 90.37 |
| *Mixonybelinia* | 0.25 | 0.42 | 0.17 | 2.18 | 92.55 |
| *Poecilancistrum* | 0.19 | 0.31 | 0.17 | 1.63 | 94.18 |
| *Sphyriocephalus* | 0.25 | 0.3 | 0.11 | 1.57 | 95.74 |
| *Pseudogrillotia* | 0.19 | 0.2 | 0.14 | 1.01 | 96.75 |
| *Hepatoxylon* | 0.16 | 0.19 | 0.1 | 0.97 | 97.73 |
| *Gymnorhynchus* | 0.16 | 0.16 | 0.11 | 0.84 | 98.57 |
| *Molicola* | 0.13 | 0.14 | 0.11 | 0.74 | 99.31 |
| *Gilquinia* | 0.13 | 0.08 | 0.04 | 0.42 | 99.72 |
| *Lacistorhynchus* | 0.06 | 0.03 | 0.04 | 0.16 | 99.88 |
| *Dollfusiella* | 0.09 | 0.02 | 0.04 | 0.12 | 100 |
|  |  |  |  |  |  |
| **Group Invertebrate: average similarity = 18.76** | | | | | |
| *Dollfusiella* | 1.09 | 7.6 | 0.64 | 40.53 | 40.53 |
| *Nybelinia* | 0.64 | 5.65 | 0.52 | 30.13 | 70.66 |
| *Lacistorhynchus* | 0.36 | 1.55 | 0.33 | 8.27 | 78.94 |
| *Prochristianella* | 0.36 | 0.81 | 0.23 | 4.29 | 83.23 |
| *Diesingium* | 0.36 | 0.62 | 0.24 | 3.28 | 86.51 |
| *Trigonolobium* | 0.18 | 0.61 | 0.13 | 3.23 | 89.74 |
| *Tetrarhynchobothrium* | 0.27 | 0.59 | 0.24 | 3.15 | 92.89 |
| *Mixonybelinia* | 0.18 | 0.36 | 0.13 | 1.94 | 94.83 |
| *Gilquinia* | 0.18 | 0.36 | 0.13 | 1.94 | 96.77 |
| *Pseudolacistorhynchus* | 0.27 | 0.24 | 0.13 | 1.29 | 98.06 |
| *Callitetrarhynchus* | 0.18 | 0.18 | 0.13 | 0.97 | 99.03 |
| *Eutetrarhynchus* | 0.18 | 0.18 | 0.13 | 0.97 | 100 |

**Table S4.** SIMPER analysis results for similarities in each depth of all sharks.

| **Genus** | **Average No. of species** | **Average similarity** | **SD of similarity** | **Contribution  (%)** | **Cumulative  contribution (%)** |
| --- | --- | --- | --- | --- | --- |
| **Group Shallow: average similarity = 18.10** | | | | | |
| *Nybelinia* | 1.18 | 7.11 | 0.66 | 39.3 | 39.3 |
| *Otobothrium* | 0.72 | 1.83 | 0.35 | 10.1 | 49.4 |
| *Dollfusiella* | 0.46 | 1.74 | 0.26 | 9.6 | 59 |
| *Dasyrhynchus* | 0.49 | 1.13 | 0.29 | 6.23 | 65.23 |
| *Callitetrarhynchus* | 0.38 | 1.11 | 0.33 | 6.15 | 71.38 |
| *Heteronybelinia* | 0.38 | 0.92 | 0.26 | 5.07 | 76.45 |
| *Grillotia* | 0.23 | 0.72 | 0.18 | 3.99 | 80.45 |
| *Tentacularia* | 0.26 | 0.71 | 0.24 | 3.9 | 84.35 |
| *Mixonybelinia* | 0.26 | 0.59 | 0.19 | 3.26 | 87.61 |
| *Lacistorhynchus* | 0.18 | 0.55 | 0.16 | 3.04 | 90.64 |
| *Floriceps* | 0.23 | 0.53 | 0.21 | 2.9 | 93.54 |
| *Poecilancistrum* | 0.15 | 0.21 | 0.14 | 1.16 | 94.71 |
| *Prochristianella* | 0.15 | 0.16 | 0.11 | 0.86 | 95.57 |
| *Pseudogrillotia* | 0.15 | 0.13 | 0.11 | 0.73 | 96.3 |
| *Sphyriocephalus* | 0.18 | 0.12 | 0.06 | 0.66 | 96.95 |
| *Gilquinia* | 0.08 | 0.11 | 0.06 | 0.58 | 97.54 |
| *Molicola* | 0.1 | 0.1 | 0.09 | 0.53 | 98.06 |
| *Hepatoxylon* | 0.1 | 0.05 | 0.06 | 0.25 | 98.32 |
| *Diesingium* | 0.1 | 0.05 | 0.06 | 0.25 | 98.57 |
| *Trigonolobium* | 0.05 | 0.04 | 0.04 | 0.25 | 98.82 |
| *Tetrarhynchobothrium* | 0.08 | 0.04 | 0.06 | 0.24 | 99.06 |
| *Gymnorhynchus* | 0.1 | 0.04 | 0.06 | 0.23 | 99.29 |
| *Eutetrarhynchus* | 0.08 | 0.04 | 0.06 | 0.21 | 99.49 |
| *Hornelliella* | 0.05 | 0.03 | 0.04 | 0.19 | 99.68 |
| *Pterobothrium* | 0.05 | 0.02 | 0.04 | 0.11 | 99.79 |
| *Pintneriella* | 0.05 | 0.02 | 0.04 | 0.11 | 99.9 |
| *Pseudolacistorhynchus* | 0.08 | 0.02 | 0.04 | 0.1 | 100 |
| **Group Deep: average similarity = 33.73** | | | | | |
| *Grillotia* | 1.88 | 31.79 | 1.22 | 94.25 | 94.25 |
| *Gilquinia* | 0.5 | 1.43 | 0.19 | 4.24 | 98.49 |
| *Nybelinia* | 0.25 | 0.51 | 0.19 | 1.51 | 100 |

**Table S5.** SIMPER analysis results for similarities in each order of all sharks.

| **Genus** | **Average No. of species** | **Average similarity** | **SD of similarity** | **Contribution  (%)** | **Cumulative  contribution (%)** |
| --- | --- | --- | --- | --- | --- |
| **Group Carcharihiniformes: average similarity = 23.49** | | | | | |
| *Nybelinia* | 1.32 | 7.76 | 0.8 | 33.03 | 33.03 |
| *Otobothrium* | 0.96 | 3.15 | 0.48 | 13.43 | 46.46 |
| *Dasyrhynchus* | 0.68 | 2.38 | 0.41 | 10.14 | 56.6 |
| *Callitetrarhynchus* | 0.54 | 2.34 | 0.47 | 9.98 | 66.58 |
| *Heteronybelinia* | 0.54 | 2.07 | 0.36 | 8.83 | 75.41 |
| *Dollfusiella* | 0.43 | 1.15 | 0.25 | 4.9 | 80.32 |
| *Tentacularia* | 0.32 | 1.1 | 0.3 | 4.67 | 84.99 |
| *Floriceps* | 0.32 | 1.03 | 0.31 | 4.39 | 89.37 |
| *Lacistorhynchus* | 0.25 | 0.68 | 0.19 | 2.88 | 92.25 |
| *Poecilancistrum* | 0.21 | 0.41 | 0.2 | 1.76 | 94.01 |
| *Grillotia* | 0.18 | 0.4 | 0.16 | 1.68 | 95.69 |
| *Pseudogrillotia* | 0.21 | 0.26 | 0.16 | 1.1 | 96.79 |
| *Diesingium* | 0.18 | 0.2 | 0.13 | 0.84 | 97.63 |
| *Gilquinia* | 0.11 | 0.16 | 0.09 | 0.67 | 98.3 |
| *Prochristianella* | 0.18 | 0.14 | 0.13 | 0.61 | 98.9 |
| *Trigonolobium* | 0.07 | 0.09 | 0.05 | 0.38 | 99.28 |
| *Eutetrarhynchus* | 0.11 | 0.07 | 0.09 | 0.31 | 99.59 |
| *Pterobothrium* | 0.07 | 0.04 | 0.05 | 0.17 | 99.76 |
| *Mixonybelinia* | 0.11 | 0.03 | 0.05 | 0.13 | 99.89 |
| *Tetrarhynchobothrium* | 0.07 | 0.03 | 0.05 | 0.11 | 100 |
|  |  |  |  |  |  |
| **Group Hexanchiformes: average similarity = 22.73** | | | | | |
| *Grillotia* | 2.33 | 16.67 | 0.58 | 73.33 | 73.33 |
| *Nybelinia* | 1 | 6.06 | 0.58 | 26.67 | 100 |
|  |  |  |  |  |  |
| **Group Lamniformes: average similarity = 20.52** | | | | | |
| *Nybelinia* | 1.14 | 7.32 | 0.53 | 35.68 | 35.68 |
| *Sphyriocephalus* | 1 | 4.19 | 0.39 | 20.43 | 56.11 |
| *Mixonybelinia* | 0.71 | 4.04 | 0.61 | 19.68 | 75.8 |
| *Gymnorhynchus* | 0.57 | 2.28 | 0.39 | 11.09 | 86.89 |
| *Molicola* | 0.43 | 1.9 | 0.39 | 9.24 | 96.13 |
| *Hepatoxylon* | 0.29 | 0.79 | 0.22 | 3.87 | 100 |
|  |  |  |  |  |  |
| **Group Orectolobiformes: average similarity = 20.28** | | | | | |
| *Dollfusiella* | 1.2 | 16.94 | 0.83 | 83.56 | 83.56 |
| *Mixonybelinia* | 0.4 | 2 | 0.32 | 9.86 | 93.42 |
| *Pseudolacistorhynchus* | 0.6 | 1.33 | 0.32 | 6.58 | 100 |
|  |  |  |  |  |  |
| **Group Squaliformes: : average similarity = 28.79** | | | | | |
| *Grillotia* | 1.4 | 24.79 | 0.94 | 86.11 | 86.11 |
| *Gilquinia* | 0.8 | 4 | 0.32 | 13.89 | 100 |

**Table S6.** SIMPER analysis results for similarities in each habitat of carcharhiniform.

| **Genus** | **Av. No. of species** | **Average similarity** | **SD of similarity** | **Contribution  (%)** | **Cumulative  contribution (%)** |
| --- | --- | --- | --- | --- | --- |
| **Group Pelagic: average similarity = 31.16** | | | | | |
| *Nybelinia* | 1.45 | 6.38 | 0.66 | 20.49 | 20.49 |
| *Otobothrium* | 1.30 | 5.24 | 0.67 | 16.83 | 37.33 |
| *Dasyrhynchus* | 0.95 | 4.74 | 0.64 | 15.21 | 52.53 |
| *Heteronybelinia* | 0.75 | 4.13 | 0.54 | 13.24 | 65.77 |
| *Callitetrarhynchus* | 0.70 | 4.06 | 0.65 | 13.02 | 78.8 |
| *Tentacularia* | 0.45 | 2.18 | 0.44 | 7 | 85.8 |
| *Floriceps* | 0.45 | 2.05 | 0.45 | 6.58 | 92.37 |
| *Poecilancistrum* | 0.30 | 0.82 | 0.28 | 2.64 | 95.01 |
| *Grillotia* | 0.25 | 0.79 | 0.23 | 2.53 | 97.54 |
| *Pseudogrillotia* | 0.30 | 0.51 | 0.23 | 1.64 | 99.18 |
| *Dollfusiella* | 0.20 | 0.15 | 0.13 | 0.49 | 99.68 |
| *Mixonybelinia* | 0.15 | 0.06 | 0.07 | 0.19 | 99.86 |
| *Prochristianella* | 0.10 | 0.04 | 0.07 | 0.14 | 100 |
|  | | | | | |
| **Group Benthal: average similarity = 33.88** | | | | | |
| *Nybelinia* | 1.00 | 16.82 | 1.23 | 49.65 | 49.65 |
| *Dollfusiella* | 1.00 | 6.79 | 0.62 | 20.05 | 69.7 |
| *Lacistorhynchus* | 0.63 | 6.08 | 0.66 | 17.94 | 87.65 |
| *Diesingium* | 0.50 | 1.21 | 0.34 | 3.57 | 91.22 |
| *Trigonolobium* | 0.25 | 1.19 | 0.19 | 3.51 | 94.73 |
| *Gilquinia* | 0.25 | 0.71 | 0.19 | 2.11 | 96.84 |
| *Tetrarhynchobothrium* | 0.25 | 0.36 | 0.19 | 1.05 | 97.89 |
| *Eutetrarhynchus* | 0.25 | 0.36 | 0.19 | 1.05 | 98.95 |
| *Prochristianella* | 0.38 | 0.36 | 0.19 | 1.05 | 100 |

**Table S7.** SIMPER analysis results for similarities in each diet of carcharhiniform.

| **Genus** | **Av. No. of species** | | **Average similarity** | **SD of similarity** | **Contribution  (%)** | **Cumulative  contribution (%)** |
| --- | --- | --- | --- | --- | --- | --- |
| **Group Fish: average similarity = 32.44** | | | | | | |
| *Nybelinia* | 1.39 | | 5.34 | 0.59 | 16.47 | 16.47 |
| *Otobothrium* | 1.22 | | 5.33 | 0.7 | 16.43 | 32.9 |
| *Dasyrhynchus* | 1.00 | | 5.2 | 0.66 | 16.04 | 48.95 |
| *Heteronybelinia* | 0.83 | | 5.12 | 0.62 | 15.79 | 64.74 |
| *Callitetrarhynchus* | | 0.72 | 4.37 | 0.66 | 13.47 | 78.21 |
| *Tentacularia* | 0.44 | | 2.22 | 0.43 | 6.84 | 85.06 |
| *Floriceps* | 0.44 | | 2.07 | 0.44 | 6.37 | 91.43 |
| *Poecilancistrum* | 0.33 | | 1.02 | 0.32 | 3.15 | 94.58 |
| *Grillotia* | 0.28 | | 0.98 | 0.25 | 3.01 | 97.59 |
| *Pseudogrillotia* | 0.33 | | 0.64 | 0.25 | 1.96 | 99.55 |
| *Mixonybelinia* | 0.17 | | 0.07 | 0.08 | 0.22 | 99.78 |
| *Dollfusiella* | 0.17 | | 0.07 | 0.08 | 0.22 | 100 |
|  |  | |  |  |  |  |
| **Group Invertebrate: average similarity = 29.47** | | | | | | |
| *Nybelinia* | 1 | | 14.8 | 1.12 | 50.24 | 50.24 |
| *Dollfusiella* | 1 | | 5.02 | 0.51 | 17.03 | 67.27 |
| *Lacistorhynchus* | 0.57 | | 4.07 | 0.59 | 13.8 | 81.06 |
| *Diesingium* | 0.57 | | 1.61 | 0.39 | 5.47 | 86.53 |
| *Trigonolobium* | 0.29 | | 1.59 | 0.22 | 5.39 | 91.92 |
| *Gilquinia* | 0.29 | | 0.95 | 0.22 | 3.23 | 95.15 |
| *Tetrarhynchobothrium* | 0.29 | | 0.48 | 0.22 | 1.62 | 96.77 |
| *Eutetrarhynchus* | 0.29 | | 0.48 | 0.22 | 1.62 | 98.38 |
| *Prochristianella* | 0.43 | | 0.48 | 0.22 | 1.62 | 100 |

**Table S8.** SIMPER analysis results for similarities in each family of carcharhiniform.

| **Genus** | **Av. No. of species** | **Average similarity** | **SD of similarity** | **Contribution  (%)** | **Cumulative  contribution (%)** |
| --- | --- | --- | --- | --- | --- |
| **Group Charcharidae: average similarity = 32.88** | | | | | |
| *Dasyrhynchus* | 1.13 | 6.59 | 0.79 | 20.05 | 20.05 |
| *Nybelinia* | 1.25 | 4.77 | 0.60 | 14.52 | 34.57 |
| *Callitetrarhynchus* | 0.75 | 4.57 | 0.67 | 13.90 | 48.47 |
| *Otobothrium* | 1.25 | 4.15 | 0.61 | 12.61 | 61.08 |
| *Floriceps* | 0.56 | 3.24 | 0.61 | 9.87 | 70.95 |
| *Heteronybelinia* | 0.69 | 3.19 | 0.46 | 9.70 | 80.65 |
| *Tentacularia* | 0.50 | 2.69 | 0.50 | 8.19 | 88.84 |
| *Poecilancistrum* | 0.38 | 1.30 | 0.36 | 3.96 | 92.8 |
| *Grillotia* | 0.31 | 1.25 | 0.29 | 3.79 | 96.59 |
| *Pseudogrillotia* | 0.38 | 0.81 | 0.29 | 2.47 | 99.05 |
| *Dollfusiella* | 0.25 | 0.24 | 0.16 | 0.74 | 99.80 |
| *Prochristianella* | 0.13 | 0.07 | 0.09 | 0.2 | 100.00 |
|  |  |  |  |  |  |
| **Group Sphyrnidae: average similarity = 42.22** | | | | | |
| *Otobothrium* | 2.00 | 16.35 | 5.70 | 38.72 | 38.72 |
| *Heteronybelinia* | 1.33 | 13.17 | 3.69 | 31.2 | 69.92 |
| *Nybelinia* | 2.33 | 9.52 | 0.58 | 22.56 | 92.48 |
| *Callitetrarhynchus* | 0.67 | 3.17 | 0.58 | 7.52 | 100.00 |
|  |  |  |  |  |  |
| **Group Triakidae: average similarity = 39.05** | | | | | |
| *Lacistorhynchus* | 1.00 | 12.16 | 1.30 | 31.15 | 31.15 |
| *Nybelinia* | 1.14 | 12.16 | 1.36 | 31.15 | 62.30 |
| *Dollfusiella* | 1.14 | 9.06 | 0.77 | 23.2 | 85.50 |
| *Diesingium* | 0.71 | 3.55 | 0.61 | 9.10 | 94.60 |
| *Gilquinia* | 0.29 | 0.68 | 0.22 | 1.74 | 96.34 |
| *Tetrarhynchobothrium* | 0.29 | 0.48 | 0.22 | 1.22 | 97.56 |
| *Eutetrarhynchus* | 0.29 | 0.48 | 0.22 | 1.22 | 98.78 |
| *Prochristianella* | 0.43 | 0.48 | 0.22 | 1.22 | 100.00 |
